# Supplementary material
Source: PubMed Central journal article supplement (PMC4546879)
Supplement: NIHMS669482-supplement.pdf [file NIHMS669482-supplement.pdf]

## **S1: Example of PASE Item Recoding Into Ever- and Often- Variables**

For example, Item 4 asks how many times, in the past week, a subject walked outside their home or yard, offering ‘never’, ‘1-2 days’, ‘3-4 days’, or ‘5-7 days’ as valid responses. If the subject answers anything other than ‘never’, the subject is further asked the average number of minutes he or she walked on these trips, offering ‘less than 30 minutes’, ‘30-60 minutes’, or ‘more than 60 minutes’ as valid responses. For each item assessed with frequency and duration, we first transformed the categorical responses into an estimated number of minutes per week engaging in the activity, treating 1-2 days as 1.5 days, 3-4 days as 3.5 days, and 5-7 days as 6 days, and less than 30 minutes as 15 minutes, 30-60 minutes as 45 minutes, and 60 or more minutes as 75 minutes. For example, a subject who reported walking 3-4 days in the past week for an average of 60 or more minutes would be considered to have walked  $3.5 \text{ days} * 75 \text{ minutes} = 262.5$  minutes/week = 37.5 minutes/day on average. If it was also greater than 30, then often-walk was also coded as true. For subjects who answered ‘never’ to the initial question, both ever-walk and often-walk were coded as false.

R code to perform the re-code:

```
pase_days_ever_columns <- c('lightact_ever',  
                           'modact_ever',  
                           'strenact_ever',  
                           'strenexer_ever',  
                           'walk_ever')  
  
pase_days_often_columns <- c('lightact_often',  
                             'modact_often',  
                             'strenact_often',  
                             'strenexer_often',  
                             'walk_often')
```

**Appendix**  
**Patterns of Physical Activity Among Older Adults in New York City: A Latent Class Approach**  
**Mooney et al.**

```
pase_days_cat_to_continuous <- c(0, 1.5, 3.5, 6)

# for days columns, recode 0 (missing) as 1 (in the 0 days category)
for (column in pase_days_columns) {
  dataset[which(dataset[,column] == 0),column] <- 1
}

for (i in 1:length(pase_days_columns)) {
  days_column <- pase_days_columns[i]
  time_column <- pase_time_columns[i]
  ever_column <- pase_days_ever_columns[i]
  dataset[,ever_column] <- FALSE
  dataset[which(dataset[,days_column] > 1 & dataset[,time_column] > 0),ever_column] <-
TRUE
}

for (i in 1:length(pase_time_columns)) {
  time_column <- pase_time_columns[i]
  days_column <- pase_days_columns[i]
  pase_days <- pase_days_cat_to_continuous[dataset[,days_column]]
  pase_time <- dataset[,time_column]
  result_column_name <- paste(time_column, 'pase', sep='_')
  dataset[,result_column_name] <- (pase_days/7) * pmax(((pase_time*.5)-.25),0)
}

for (i in 1:length(pase_days_often_columns)) {
  per_day_column <- pase_per_day_columns[i]
  often_column <- pase_days_often_columns[i]
  dataset[,often_column] <- FALSE
  dataset[which(dataset[,per_day_column] > 0.5),often_column] <- TRUE
}
```

## **S2: Details of LCAs by Number of Classes**

### **LCA Model fit statistics**

| Classes | BIC      | Entropy | Smallest class |
|---------|----------|---------|----------------|
| 2       | 39893.79 | 0.3175  | 37.5%          |
| 3       | 38776.18 | 0.5815  | 18.4%          |
| 4       | 38251.79 | 0.6741  | 15.0%          |
| 5       | 37978.72 | 0.7224  | 9.2%           |
| 6       | 37971.48 | 0.7515  | 4.0%           |

BIC: Bayesian Information Criteria, lower score indicates better fit; Entropy: a measure of classification certainty, higher score indicates more certainty; Smallest class: the proportion of subjects assigned to the class with the fewest subjects.

### **Activity Frequency in 3 Class Model**

| Activity                                                          | Domestic/Garden | Least Active | Athletes |
|-------------------------------------------------------------------|-----------------|--------------|----------|
| N                                                                 | 642             | 1,872        | 983      |
| Ever sports/ recreational activities                              | 65%             | 23%          | 100%     |
| Ever muscular strength or endurance exercises                     | 42%             | 21%          | 59%      |
| Ever walking                                                      | 97%             | 81%          | 97%      |
| Sports/recreational more than 30 minutes/day                      | 33%             | 0%           | 67%      |
| Muscular strength or endurance exercises more than 30 minutes/day | 9%              | 2%           | 10%      |
| Walking more than 30 minutes/day                                  | 58%             | 31%          | 76%      |
| Light housework                                                   | 95%             | 88%          | 94%      |
| Heavy housework                                                   | 77%             | 43%          | 57%      |
| Home repairs                                                      | 34%             | 4%           | 9%       |
| Lawn work/yard care                                               | 78%             | 2%           | 4%       |
| Outdoor gardening                                                 | 85%             | 3%           | 9%       |
| Caring for others                                                 | 45%             | 24%          | 33%      |

**Appendix**  
**Patterns of Physical Activity Among Older Adults in New York City: A Latent Class Approach**  
**Mooney et al.**

**Activity Frequency in 4 Class Model**

| Activity                                                          | Least Active | Domestic/Garden | Athletic Types | Walkers |
|-------------------------------------------------------------------|--------------|-----------------|----------------|---------|
| N                                                                 | 653          | 525             | 726            | 1,593   |
| Ever sports/recreational activities                               | 20%          | 68%             | 100%           | 36%     |
| Ever muscular strength or endurance exercises                     | 19%          | 44%             | 61%            | 26%     |
| Ever walking                                                      | 49%          | 97%             | 98%            | 100%    |
| Sports/recreational more than 30 minutes/day                      | 1%           | 36%             | 83%            | 0%      |
| Muscular strength or endurance exercises more than 30 minutes/day | 2%           | 10%             | 12%            | 2%      |
| Walking more than 30 minutes/day                                  | 0%           | 57%             | 79%            | 52%     |
| Light housework                                                   | 74%          | 94%             | 93%            | 97%     |
| Heavy housework                                                   | 21%          | 76%             | 55%            | 60%     |
| Home repairs                                                      | 3%           | 36%             | 10%            | 6%      |
| Lawn work/yard care                                               | 0%           | 86%             | 5%             | 4%      |
| Outdoor gardening                                                 | 2%           | 91%             | 11%            | 7%      |
| Caring for others                                                 | 14%          | 45%             | 31%            | 33%     |

**Appendix**  
**Patterns of Physical Activity Among Older Adults in New York City: A Latent Class Approach**  
**Mooney et al.**

**Activity Frequency in 6 Class Model**

| Activity                                                                      | Least<br>Activ<br>e | Domestic/Garde<br>n Athlete | Never<br>Walker<br>s | Domestic/Garde<br>n | Athlet<br>e | Walke<br>r |
|-------------------------------------------------------------------------------|---------------------|-----------------------------|----------------------|---------------------|-------------|------------|
| N                                                                             | 317                 | 330                         | 141                  | 430                 | 649         | 1,630      |
| Ever sports/<br>recreational<br>activities                                    | 11%                 | 100%                        | 35%                  | 32%                 | 100%        | 36%        |
| Ever muscular<br>strength or<br>endurance<br>exercises                        | 18%                 | 64%                         | 20%                  | 23%                 | 60%         | 26%        |
| Ever walking                                                                  | 49%                 | 98%                         | 0%                   | 97%                 | 100%        | 100%       |
| Sports/recreational<br>more than 30<br>minutes/day                            | 0%                  | 72%                         | 14%                  | 0%                  | 81%         | 0%         |
| Muscular strength<br>or endurance<br>exercises more<br>than 30<br>minutes/day | 3%                  | 17%                         | 2%                   | 2%                  | 11%         | 2%         |
| Walking more<br>than 30<br>minutes/day                                        | 0%                  | 67%                         | 0%                   | 48%                 | 81%         | 46%        |
| Light housework                                                               | 62%                 | 93%                         | 91%                  | 97%                 | 93%         | 96%        |
| Heavy housework                                                               | 0%                  | 73%                         | 58%                  | 77%                 | 54%         | 56%        |
| Home repairs                                                                  | 0%                  | 36%                         | 7%                   | 28%                 | 9%          | 5%         |
| Lawn work/yard<br>care                                                        | 0%                  | 78%                         | 1%                   | 66%                 | 2%          | 0%         |
| Outdoor<br>gardening                                                          | 1%                  | 85%                         | 3%                   | 76%                 | 8%          | 2%         |
| Caring for others                                                             | 6%                  | 43%                         | 31%                  | 45%                 | 30%         | 30%        |

**S3: LCAs Performed Only Among Those Reporting That They Are Capable of Walking a Block (N=2,351)**

**LCA Model fit statistics**

| Classes | AIC      | BIC      | G <sup>2</sup> | $\chi^2$ | Entropy | Smallest class |
|---------|----------|----------|----------------|----------|---------|----------------|
| 2       | 27191.85 | 27335.92 | 2761.354       | 14538.56 | 0.3056  | 41.9%          |
| 3       | 26368.83 | 26587.81 | 1912.333       | 10005.4  | 0.5746  | 21.2%          |
| 4       | 26033.27 | 26327.16 | 1550.768       | 33833.36 | 0.6679  | 10.7%          |
| 5       | 25955.88 | 26324.68 | 1447.377       | 40537.82 | 0.7152  | 11.6%          |
| 6       | 25789.03 | 26232.75 | 1254.526       | 37397.26 | 0.7461  | 10.6%          |

**Appendix**  
**Patterns of Physical Activity Among Older Adults in New York City: A Latent Class Approach**  
**Mooney et al.**

**Activity Frequency in 3 Class Model**

| Activity                                                          | Domestic/Garden | Walk Only | Athletes |
|-------------------------------------------------------------------|-----------------|-----------|----------|
| N                                                                 | 499             | 1169      | 683      |
| Ever sports/ recreational activities                              | 70%             | 30%       | 100%     |
| Ever muscular strength or endurance exercises                     | 43%             | 22%       | 62%      |
| Ever walking                                                      | 98%             | 89%       | 98%      |
| Sports/recreational more than 30 minutes/day                      | 38%             | 0%        | 75%      |
| Muscular strength or endurance exercises more than 30 minutes/day | 9%              | 2%        | 11%      |
| Walking more than 30 minutes/day                                  | 63%             | 43%       | 81%      |
| Light housework                                                   | 94%             | 92%       | 93%      |
| Heavy housework                                                   | 78%             | 53%       | 57%      |
| Home repairs                                                      | 36%             | 6%        | 9%       |
| Lawn work/yard care                                               | 83%             | 3%        | 3%       |
| Outdoor gardening                                                 | 88%             | 6%        | 9%       |
| Caring for others                                                 | 44%             | 29%       | 30%      |

**Appendix**  
**Patterns of Physical Activity Among Older Adults in New York City: A Latent Class Approach**  
**Mooney et al.**

**Activity Frequency in 4 Class Model**

| Activity                                                          | Walkers | Athletes | Domestic/Garden<br>Athletes | Domestic/Garden |
|-------------------------------------------------------------------|---------|----------|-----------------------------|-----------------|
| N                                                                 | 1055    | 670      | 251                         | 375             |
| Ever sports/ recreational activities                              | 29%     | 100%     | 100%                        | 37%             |
| Ever muscular strength or endurance exercises                     | 22%     | 61%      | 63%                         | 22%             |
| Ever walking                                                      | 88%     | 98%      | 98%                         | 98%             |
| Sports/recreational more than 30 minutes/day                      | 0%      | 72%      | 78%                         | 0%              |
| Muscular strength or endurance exercises more than 30 minutes/day | 2%      | 10%      | 17%                         | 1%              |
| Walking more than 30 minutes/day                                  | 42%     | 80%      | 72%                         | 54%             |
| Light housework                                                   | 91%     | 93%      | 92%                         | 97%             |
| Heavy housework                                                   | 49%     | 57%      | 74%                         | 80%             |
| Home repairs                                                      | 4%      | 9%       | 38%                         | 28%             |
| Lawn work/yard care                                               | 0%      | 1%       | 84%                         | 63%             |
| Outdoor gardening                                                 | 1%      | 8%       | 85%                         | 73%             |
| Caring for others                                                 | 27%     | 31%      | 41%                         | 47%             |



**Appendix**  
**Patterns of Physical Activity Among Older Adults in New York City: A Latent Class Approach**  
**Mooney et al.**

**Activity Frequency in 5 Class Model**

| Activity                                                             | Domestic/Garden | Moderate<br>Athletes | Domestic/Garden<br>Athletes | Walk<br>Only | Strong<br>Athletes |
|----------------------------------------------------------------------|-----------------|----------------------|-----------------------------|--------------|--------------------|
| N                                                                    | 343             | 577                  | 273                         | 696          | 462                |
| Ever sports/ recreational activities                                 | 33%             | 100%                 | 100%                        | 0%           | 100%               |
| Ever muscular strength or endurance exercises                        | 21%             | 39%                  | 63%                         | 19%          | 66%                |
| Ever walking                                                         | 98%             | 93%                  | 98%                         | 87%          | 100%               |
| Sports/recreational more than 30 minutes/day                         | 0%              | 22%                  | 75%                         | 0%           | 87%                |
| Muscular strength or endurance exercises more than 30<br>minutes/day | 1%              | 1%                   | 16%                         | 3%           | 14%                |
| Walking more than 30 minutes/day                                     | 55%             | 44%                  | 70%                         | 44%          | 95%                |
| Light housework                                                      | 97%             | 93%                  | 92%                         | 91%          | 93%                |
| Heavy housework                                                      | 81%             | 57%                  | 74%                         | 47%          | 56%                |
| Home repairs                                                         | 29%             | 6%                   | 38%                         | 4%           | 10%                |
| Lawn work/yard care                                                  | 64%             | 1%                   | 83%                         | 1%           | 2%                 |
| Outdoor gardening                                                    | 73%             | 5%                   | 86%                         | 1%           | 8%                 |
| Caring for others                                                    | 47%             | 32%                  | 41%                         | 25%          | 29%                |

**Appendix**  
**Patterns of Physical Activity Among Older Adults in New York City: A Latent Class Approach**  
**Mooney et al.**

**Activity Frequency in 6 Class Model**

| Activity                                                          | Moderate Athlete | Domestic/Garden Athlete | Least Active | Domestic/Garden | Never Sports | Strong Athletes |
|-------------------------------------------------------------------|------------------|-------------------------|--------------|-----------------|--------------|-----------------|
| N                                                                 | 712              | 267                     | 308          | 338             | 477          | 249             |
| Ever sports/ recreational activities                              | 100%             | 100%                    | 33%          | 33%             | 0%           | 100%            |
| Ever muscular strength or endurance Exercises                     | 41%              | 63%                     | 21%          | 21%             | 20%          | 100%            |
| Ever walking                                                      | 100%             | 98%                     | 63%          | 98%             | 100%         | 99%             |
| Sports/recreational more than 30 minutes/day                      | 47%              | 76%                     | 4%           | 0%              | 0%           | 90%             |
| Muscular strength or endurance Exercises more than 30 minutes/day | 0%               | 16%                     | 2%           | 1%              | 4%           | 35%             |
| Walking more than 30 minutes/day                                  | 72%              | 71%                     | 0%           | 53%             | 68%          | 92%             |
| Light housework                                                   | 95%              | 91%                     | 82%          | 97%             | 96%          | 91%             |
| Heavy housework                                                   | 61%              | 74%                     | 36%          | 80%             | 54%          | 52%             |
| Home repairs                                                      | 8%               | 39%                     | 5%           | 29%             | 4%           | 7%              |
| Lawn work/yard care                                               | 2%               | 84%                     | 0%           | 65%             | 1%           | 1%              |
| Outdoor gardening                                                 | 7%               | 86%                     | 2%           | 77%             | 1%           | 9%              |
| Caring for others                                                 | 33%              | 40%                     | 19%          | 47%             | 29%          | 29%             |

**Appendix**  
**Patterns of Physical Activity Among Older Adults in New York City: A Latent Class Approach**  
**Mooney et al.**

**Relative Risk of Membership of 3,497 New York City Residents Aged 65-75 Surveyed in June-November 2011 in Specified Class Compared to “Walker” Class in Multivariable Model in 4-Class Model Restricted to Those Who Report Being Capable of Walking a Block**

|                        | Athletic type |        |      | Domestic/<br>Gardening type |        |       | Domestic/Gardening<br>Athletic type |        |       |
|------------------------|---------------|--------|------|-----------------------------|--------|-------|-------------------------------------|--------|-------|
|                        | Relative risk | 95% CI |      | Relative risk               | 95% CI |       | Relative risk                       | 95% CI |       |
| <b>Borough</b>         |               |        |      |                             |        |       |                                     |        |       |
| Manhattan              | 1.23          | 0.88   | 1.72 | 1.86                        | 1.08   | 3.21  | 0.75                                | 0.45   | 1.25  |
| Bronx                  | 0.87          | 0.57   | 1.32 | 1.01                        | 0.54   | 1.86  | 0.63                                | 0.37   | 1.07  |
| Brooklyn               | 0.89          | 0.64   | 1.24 | 0.82                        | 0.53   | 1.28  | 0.75                                | 0.52   | 1.09  |
| Queens                 | --            |        |      | --                          |        |       | --                                  |        |       |
| Staten Island          | 0.87          | 0.35   | 2.16 | 0.95                        | 0.39   | 2.31  | 0.88                                | 0.40   | 1.94  |
| <b>Home type</b>       |               |        |      |                             |        |       |                                     |        |       |
| Single family          | 0.79          | 0.58   | 1.07 | 8.52                        | 5.32   | 13.64 | 7.68                                | 5.15   | 11.45 |
| Low rise apartment     | 0.80          | 0.56   | 1.15 | 1.55                        | 0.85   | 2.81  | 1.24                                | 0.68   | 2.28  |
| High-rise apartment    | --            |        |      | --                          |        |       | --                                  |        |       |
| <b>Sex</b>             |               |        |      |                             |        |       |                                     |        |       |
| Male                   | --            |        |      | --                          |        |       | --                                  |        |       |
| Female                 | 0.84          | 0.67   | 1.05 | 0.65                        | 0.47   | 0.91  | 0.92                                | 0.69   | 1.24  |
| <b>Age group</b>       |               |        |      |                             |        |       |                                     |        |       |
| 65-68                  | --            |        |      | --                          |        |       | --                                  |        |       |
| 69-71                  | 1.11          | 0.82   | 1.51 | 0.78                        | 0.50   | 1.24  | 1.12                                | 0.75   | 1.67  |
| 72-75                  | 0.89          | 0.69   | 1.15 | 0.86                        | 0.60   | 1.24  | 0.93                                | 0.66   | 1.30  |
| <b>Education</b>       |               |        |      |                             |        |       |                                     |        |       |
| < High school graduate | 0.97          | 0.65   | 1.44 | 0.87                        | 0.46   | 1.64  | 0.94                                | 0.57   | 1.54  |
| High school graduate   | --            |        |      | --                          |        |       | --                                  |        |       |
| Some college           | 1.22          | 0.86   | 1.74 | 0.97                        | 0.58   | 1.63  | 0.95                                | 0.62   | 1.47  |
| College graduate       | 1.45          | 1.04   | 2.02 | 1.42                        | 0.90   | 2.23  | 1.06                                | 0.71   | 1.58  |
| <b>Race/Ethnicity</b>  |               |        |      |                             |        |       |                                     |        |       |
| Black (non-Hispanic)   | 1.16          | 0.87   | 1.56 | 0.82                        | 0.53   | 1.26  | 0.89                                | 0.62   | 1.28  |

**Appendix**  
**Patterns of Physical Activity Among Older Adults in New York City: A Latent Class Approach**  
**Mooney et al.**

|                                                |      |      |      |      |      |      |      |      |      |
|------------------------------------------------|------|------|------|------|------|------|------|------|------|
| White (non-<br>Hispanic)                       | --   |      |      | --   |      |      | --   |      |      |
| Other                                          | 1.10 | 0.66 | 1.86 | 1.29 | 0.66 | 2.50 | 1.25 | 0.69 | 2.27 |
| Hispanic                                       | 1.19 | 0.75 | 1.90 | 0.70 | 0.31 | 1.63 | 0.79 | 0.40 | 1.55 |
| <b>Safe to walk after dark in neighborhood</b> |      |      |      |      |      |      |      |      |      |
| Strongly agree                                 | --   |      |      | --   |      |      | --   |      |      |
| Somewhat agree                                 | 0.99 | 0.77 | 1.27 | 0.79 | 0.55 | 1.14 | 0.96 | 0.69 | 1.33 |
| Somewhat<br>disagree                           | 0.87 | 0.56 | 1.36 | 1.00 | 0.53 | 1.90 | 1.32 | 0.78 | 2.23 |
| Strongly<br>disagree                           | 0.78 | 0.50 | 1.22 | 1.07 | 0.56 | 2.07 | 1.30 | 0.76 | 2.21 |
| <b>Health</b>                                  |      |      |      |      |      |      |      |      |      |
| Excellent                                      | 1.57 | 1.18 | 2.08 | 2.09 | 1.43 | 3.07 | 1.32 | 0.89 | 1.95 |
| Good                                           | --   |      |      | --   |      |      | --   |      |      |
| Fair                                           | 0.65 | 0.48 | 0.87 | 0.51 | 0.31 | 0.83 | 0.85 | 0.59 | 1.23 |
| Poor                                           | 0.51 | 0.21 | 1.26 | 0.23 | 0.04 | 1.36 | 0.59 | 0.21 | 1.62 |
| <b>Household<br/>income</b>                    |      |      |      |      |      |      |      |      |      |
| <\$20,000                                      | --   |      |      | --   |      |      | --   |      |      |
| \$20,000-<br>\$39,999                          | 1.22 | 0.88 | 1.69 | 1.91 | 1.06 | 3.41 | 1.71 | 1.07 | 2.75 |
| \$40,000-<br>\$79,999                          | 1.50 | 1.03 | 2.17 | 1.90 | 0.99 | 3.64 | 1.53 | 0.91 | 2.56 |
| \$80,000+                                      | 1.29 | 0.86 | 1.94 | 1.97 | 1.10 | 3.54 | 1.96 | 1.17 | 3.30 |

**S4: LCA in Which Sports/Recreation Categories Not Compressed**

**Model Fit**

| Classes | AIC      | BIC      | G <sup>2</sup> | $\chi^2$ | Entropy  | Smallest class |
|---------|----------|----------|----------------|----------|----------|----------------|
| 2       | 48242.47 | 48445.74 | 7488.379       | 708321.2 | 0.376116 | 0.378610       |
| 3       | 47134.42 | 47442.40 | 6346.330       | 671699.5 | 0.615387 | 0.149843       |
| 4       | 46467.00 | 46879.69 | 5644.906       | 280245.9 | 0.700155 | 0.143838       |
| 5       | 46042.73 | 46560.14 | 5186.636       | 457275.2 | 0.744703 | 0.073778       |
| 6       | 45822.35 | 46444.48 | 4932.266       | 865192.5 | 0.772031 | 0.020303       |
| 7       | 45464.44 | 46191.28 | 4540.347       | 295701.6 | 0.791844 | 0.022591       |
| 8       | 45285.41 | 46116.96 | 4327.319       | 521374.8 | 0.806148 | 0.022305       |
| 9       | 45163.09 | 46099.36 | 4170.999       | 335087.0 | 0.817266 | 0.018587       |

By fit statistics, the 9-class model fits best, but some classes are so granular as to be unhelpful (e.g., class 4, who does endurance exercises and strenuous recreation sports if any or class 6, who does moderate only).

**Activity Frequency in 9 Class Model**

| Activity                                               | 1    | 2    | 3    | 4   | 5   | 6    | 7    | 8   | 9   |
|--------------------------------------------------------|------|------|------|-----|-----|------|------|-----|-----|
| Light sports/ recreational activities                  | 9%   | 100% | 100% | 7%  | 8%  | 1%   | 100% | 87% | 11% |
| Moderate sports/ recreational activities               | 19%  | 96%  | 32%  | 21% | 5%  | 100% | 100% | 65% | 18% |
| Strenuous sports/ recreational activities              | 4%   | 100% | 21%  | 37% | 2%  | 23%  | 48%  | 44% | 3%  |
| Ever muscular strength or endurance exercises          | 18%  | 77%  | 57%  | 91% | 18% | 38%  | 68%  | 66% | 19% |
| Ever walking                                           | 100% | 100% | 94%  | 99% | 46% | 98%  | 99%  | 97% | 96% |
| Light sports/recreational more than 30 minutes/day     | 0%   | 100% | 32%  | 0%  | 0%  | 0%   | 42%  | 33% | 0%  |
| Moderate sports/recreational more than 30 minutes/day  | 0%   | 85%  | 0%   | 0%  | 0%  | 74%  | 40%  | 13% | 0%  |
| Strenuous sports/recreational more than 30 minutes/day | 0%   | 87%  | 2%   | 15% | 0%  | 7%   | 4%   | 7%  | 0%  |

**Appendix**  
**Patterns of Physical Activity Among Older Adults in New York City: A Latent Class Approach**  
**Mooney et al.**

|                                                                   |       |      |       |      |       |      |       |      |       |
|-------------------------------------------------------------------|-------|------|-------|------|-------|------|-------|------|-------|
| Muscular strength or endurance exercises more than 30 minutes/day | 0%    | 47%  | 6%    | 45%  | 2%    | 7%   | 8%    | 16%  | 0%    |
| Walking more than 30 minutes/day                                  | 52%   | 93%  | 50%   | 66%  | 0%    | 85%  | 82%   | 57%  | 50%   |
| Light housework                                                   | 97%   | 90%  | 91%   | 87%  | 73%   | 96%  | 96%   | 92%  | 98%   |
| Heavy housework                                                   | 57%   | 66%  | 47%   | 50%  | 20%   | 62%  | 60%   | 73%  | 78%   |
| Home repairs                                                      | 4%    | 41%  | 7%    | 11%  | 2%    | 11%  | 9%    | 37%  | 27%   |
| Lawn work/yard care                                               | 0%    | 40%  | 2%    | 4%   | 0%    | 17%  | 5%    | 87%  | 63%   |
| Outdoor gardening                                                 | 0%    | 47%  | 10%   | 8%   | 2%    | 18%  | 11%   | 91%  | 76%   |
| Caring for others                                                 | 31%   | 51%  | 23%   | 38%  | 14%   | 39%  | 33%   | 42%  | 45%   |
| Proportion of cohort                                              | 30.6% | 1.9% | 11.2% | 2.5% | 19.8% | 5.2% | 11.0% | 7.2% | 10.8% |

### S5: 5-Class LCA Using Expectation Maximization to Account for Missing Data

#### Activity Frequency in 5 Class Model

| Activity                                                             | Domestic/Garden<br>Athlete | Walker | Athlete | Domestic/Garden | Least<br>Active |
|----------------------------------------------------------------------|----------------------------|--------|---------|-----------------|-----------------|
| Ever sports/ recreational activities                                 | 100%                       | 36%    | 100%    | 34%             | 16%             |
| Ever muscular strength or endurance exercises                        | 74%                        | 0%     | 80%     | 0%              | 1%              |
| Ever walking                                                         | 63%                        | 26%    | 61%     | 24%             | 18%             |
| Sports/recreational more than 30 minutes/day                         | 99%                        | 100%   | 98%     | 97%             | 48%             |
| Muscular strength or endurance exercises more than 30<br>minutes/day | 18%                        | 2%     | 11%     | 2%              | 2%              |
| Walking more than 30 minutes/day                                     | 70%                        | 50%    | 78%     | 48%             | 0%              |
| Light housework                                                      | 93%                        | 97%    | 93%     | 97%             | 72%             |
| Heavy housework                                                      | 74%                        | 56%    | 54%     | 76%             | 19%             |
| Home repairs                                                         | 37%                        | 4%     | 9%      | 27%             | 2%              |
| Lawn work/yard care                                                  | 81%                        | 0%     | 2%      | 62%             | 0%              |
| Outdoor gardening                                                    | 84%                        | 1%     | 8%      | 73%             | 2%              |
| Caring for others                                                    | 43%                        | 30%    | 31%     | 45%             | 13%             |
| Proportion of cohort                                                 | 10%                        | 22%    | 37%     | 13%             | 17%             |
